# Supplementary material for: Regulation of B cell fate by chronic activity of the IgE B cell receptor
Source: eLife. 2016 Dec 9;5:e21238. doi: 10.7554/eLife.21238 (PMC5207771; doi:10.7554/eLife.21238)
Supplement: Supplementary file 2. — DOI: http://dx.doi.org/10.7554/eLife.21238.017 [file elife-21238-supp2.xlsx]

## Sheet: Sheet1
Supplementary file 2	Table of exact p values from all statistical comparisons
Figure	Comparison	p value
1B	IgE PC% vs IgG1 PC% with 62.5 ng/ml a-CD40	6.86735e-08
	IgE PC% vs IgG1 PC% with 250 ng/ml a-CD40	1.95655e-07
1D	Thy1 vs. mIgM	0.8255
	Thy1 vs. mIgD	0.0002
	Thy1 vs. mIgG1	0.1794
	Thy1 vs. mIgE	0.0001
	Thy1 vs. mIgA	0.0001
1F	mIgM no Ag vs mIgM with Ag	0.00218526
	mIgD no Ag vs mIgD with Ag	3.75415e-07
	mIgG1 no Ag vs mIgG1 with Ag	6.69448e-09
	mIgE no Ag vs mIgE with Ag	0.753794
	mIgA no Ag vs mIgA with Ag	0.242782
2A (in Aicda ko cells)	mIgE vs mIgE with mIgG1 CT	0.9998
	mIgE vs mIgE with mIgG1 TM	0.9839
	mIgE vs mIgE with mIgG1 CT & TM	0.8969
	mIgE vs mIgE with mIgG1 migis, CT & TM	0.0001
	mIgE vs mIgE with mIgG1 migis & CT	0.0001
	mIgE vs mIgE with mIgG1 migis	0.0001
	mIgG1 vs mIgG1 with mIgE CT	0.9665
	mIgG1 vs mIgG1 with mIgE TM	0.9979
	mIgG1 vs mIgG1 with mIgE CT & TM	0.9574
	mIgG1 vs mIgG1 with mIgE migis, CT & TM	0.0001
	mIgG1 vs mIgG1 with mIgE migis & CT	0.002
	mIgG1 vs mIgG1 with mIgE migis	0.0223
2F (in B1-8f/+, Cg1Cre/+ cells)	mIgE vs mIgE with mIgG1 CT	0.9979
	mIgE vs mIgE with mIgG1 TM	0.9999
	mIgE vs mIgE with mIgG1 CT & TM	0.9739
	mIgE vs mIgE with mIgG1 migis, CT & TM	0.0052
	mIgE vs mIgE with mIgG1 migis & CT	0.0048
	mIgE vs mIgE with mIgG1 migis	0.0169
	mIgG1 vs mIgG1 with mIgE CT	0.0063
	mIgG1 vs mIgG1 with mIgE TM	0.847
	mIgG1 vs mIgG1 with mIgE CT & TM	0.0001
	mIgG1 vs mIgG1 with mIgE migis, CT & TM	0.0001
	mIgG1 vs mIgG1 with mIgE migis & CT	0.0001
	mIgG1 vs mIgG1 with mIgE migis	0.0057
2G (in B1-8f/+, Cg1Cre/+ cells)	mIgE vs mIgE with mIgG1 CH1	0.9915
	mIgE vs mIgE with mIgG1 hinge	0.6589
	mIgE vs mIgE with mIgG1 CH2	0.6631
	mIgE vs mIgE with mIgG1 CH3	0.9999
	mIgE vs mIgE with mIgG1 hinge & CH2	0.2915
	mIgE vs mIgE with mIgG1 CH1 to CH3	0.1713
	mIgE with mIgG1 TM & CT vs mIgE with mIgG1 TM & CT with mIgG1 CH1, TM & CT	0.9999
	mIgE with mIgG1 TM & CT vs mIgE with mIgG1 TM & CT with mIgG1 hinge, TM & CT	0.0255
	mIgE with mIgG1 TM & CT vs mIgE with mIgG1 TM & CT with mIgG1 CH2, TM & CT	0.0428
	mIgE with mIgG1 TM & CT vs mIgE with mIgG1 TM & CT with mIgG1 CH3, TM & CT	0.9774
	mIgE with mIgG1 TM & CT vs mIgE with mIgG1 TM & CT with mIgG1 hinge, CH2, TM & CT	0.0138
	mIgE with mIgG1 TM & CT vs mIgE with mIgG1 TM & CT with mIgG1 CH1 to CH3, TM & CT	0.0061
3A	IgE+CD69hi vs IgG1+CD69hi	<1E-04
3B	IgE+Nur77-GFP+ vs IgG1+Nur77-GFP+	0.0079
3E	IgE vs IgG1 BCR microcluster fluorescence intensity	0.002
3F	IgE vs IgG1 BCR microcluster size	0.0046
4A	IgE untreated vs IgE Ib treated	2.83874e-06
	IgG1 untreated vs IgG1 Ib treated	2.89899e-05
4B	Ctrl IgE vs Syk het IgE	0.000345169
	Ctrl IgG1 vs Syk het IgG1	0.000415458
4C	WT IgE vs Cd19 ko IgE	0.00153749
	WT IgG1 vs Cd19 ko IgG1	0.121913
4D	WT IgE vs Blnk ko IgE	0.000237051
	WT IgG1 vs Blnk ko IgG1	0.0125351
4E	IgE without Ag Ib 0 vs. Ib 12.5	0.0311
	IgE without Ag Ib 0 vs. Ib 50	0.0216
	IgE with Ag Ib 0 vs. Ib 12.5	0.4099
	IgE with Ag Ib 0 vs. Ib 50	0.997
	IgG1 without Ag Ib 0 vs. Ib 12.5	0.0089
	IgG1 without Ag Ib 0 vs. Ib 50	0.0035
	IgG1 with Ag Ib 0 vs. Ib 12.5	0.7268
	IgG1 with Ag Ib 0 vs. Ib 50	0.3444
5A	IgE GC% WT vs Blnk ko	0.0001
	IgE GC% WT vs Cd19 het	0.0009
	IgG1 GC% WT vs Blnk ko	0.989
	IgG1 GC% WT vs Cd19 het	0.5659
	IgE PC# WT vs Blnk ko	0.0002
	IgE PC# WT vs Cd19 het	0.0224
	IgG1 PC# WT vs Blnk ko	0.9567
	IgG1 PC# WT vs Cd19 het	0.372
5B	IgE GC% Vehicle vs ibrutinib treated	5.34153e-05
	IgG1 GC% Vehicle vs ibrutinib treated	0.985228
	IgE PC# Vehicle vs ibrutinib treated	0.0621942
	IgG1 PC# Vehicle vs ibrutinib treated	0.985228
5C	IgE GC% Ctrl vs Syk het	2.01663e-05
	IgG1 GC% Ctrl vs Syk het	0.0921782
	IgE PC# Ctrl vs Syk het	1.83402e-05
	IgG1 PC# Ctrl vs Syk het	0.20068
5D	IgE GC% Ctrl vs Irf4 het	0.00334246
	IgG1 GC% Ctrl vs Irf4 het	0.00397712
	IgE PC# Ctrl vs Irf4 het	0.0718822
	IgG1 PC# Ctrl vs Irf4 het	0.574392
6C	Annexin V+% of non-PC of B1-8 cells expressing #1, 2, 3, 4, or 5	0.8224
6F	Activated Cas3+% IgE GC vs IgG1 GC	0.1633
6H	AnnexinV+VAD-FMK+% IgE GC vs IgG1 GC	0.9317
6I	Day 7 IgE+ GC B% WT vs Bcl2 Tg	0.440267
	Day 14 IgE+ GC B% WT vs Bcl2 Tg	0.505282
	Day 28 IgE+ GC B% WT vs Bcl2 Tg	0.440267
	Day 7 IgG1+ GC B% WT vs Bcl2 Tg	0.0625873
	Day 14 IgG1+ GC B% WT vs Bcl2 Tg	0.305261
	Day 28 IgG1+ GC B% WT vs Bcl2 Tg	0.0625873
7B	% of EdU+ GC cells in G1 phase: IgE+ vs IgG1+	0.002
7C	% of EdU+ GC cells in G1 phase, vehicle control: IgE+ vs IgG1+	0.00338
	% of EdU+ GC cells in G1 phase, ibrutinib treated: IgE+ vs IgG1+	0.912638
7E	surface HEL binding (gMFI) of transferred Hy10 cells: IgE+ vs IgG1+	6e-15
	surface HEL binding (gMFI) of endogenous B cells: IgE+ vs IgG1+	0.329111
7G	% of Y-Ae+ of transferred Hy10 cells: IgE+ vs IgG1+	0.00583456
	% of Y-Ae+ of endogenous B cells: IgE+ vs IgG1+	0.38895
1-supplement 2	mIgM no Ag vs mIgM with Ag	0.0217551
	mIgD no Ag vs mIgD with Ag	0.0175298
	mIgG1 no Ag vs mIgG1 with Ag	1.01547e-05
	mIgE no Ag vs mIgE with Ag	0.122635
	mIgA no Ag vs mIgA with Ag	0.438923
4-supplement 1	CD138+% of IgE+: Ctrl vs Irf4 het	0.00505572
	CD138+% of IgG1+: Ctrl vs Irf4 het	0.0199914
5-supplement 1A	Draining LN cellularity WT vs Blnk ko	0.7556
	Draining LN cellularity WT vs Cd19 het	0.5259
	GC B cell# WT vs Blnk ko	0.356
	GC B cell# WT vs Cd19 het	0.6794
5-supplement 1B	Draining LN cellularity vehicle vs ibrutinib treated	0.279415
	GC B cell# vehicle vs ibrutinib treated	0.137076
5-supplement 1C	Draining LN cellularity Ctrl vs Syk het	0.179696
	GC B cell# Ctrl vs Syk het	0.0827855
5-supplement 1D	Draining LN cellularity Ctrl vs Irf4 het	0.0211547
	GC B cell# Ctrl vs Irf4 het	0.916536
