# Supplementary figures and images for: Regulation of B cell fate by chronic activity of the IgE B cell receptor
Source: eLife journal article supplement (doi:10.7554/elife.21238), 2016-12-09

# Figure 5—figure supplement 2

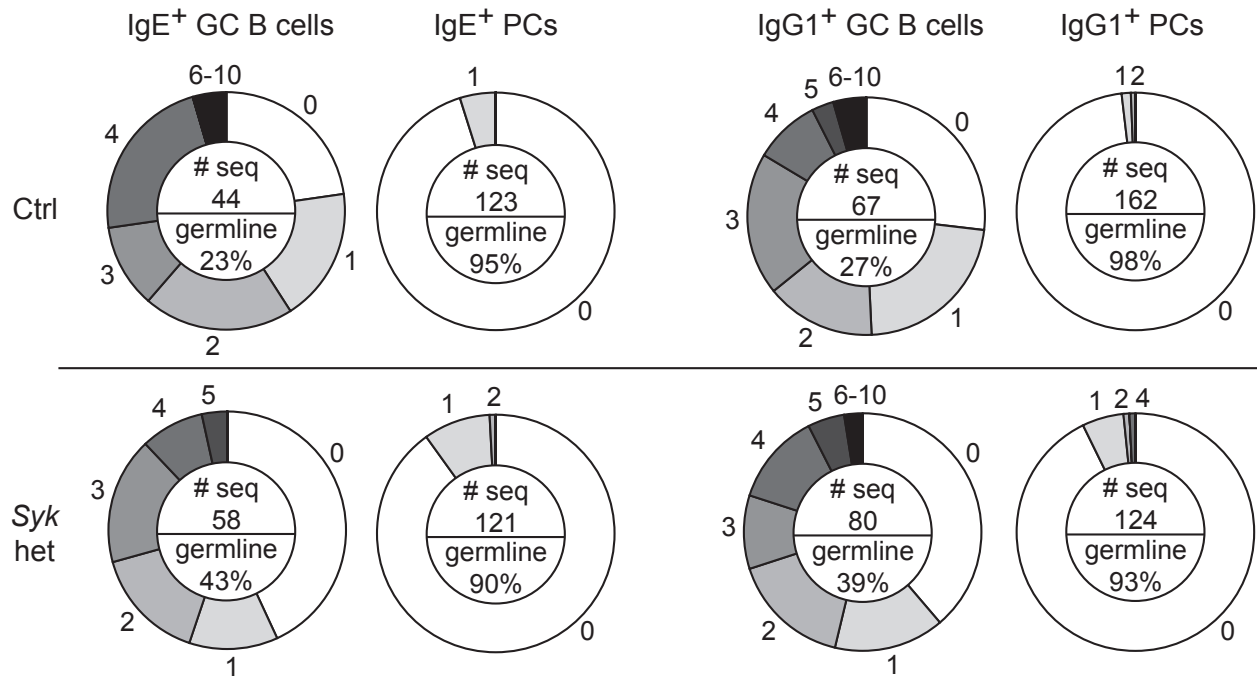

Supplement: supp [file elife-21238-supp-v1.zip]

# Figure 2 - figure supplement 1

**A**

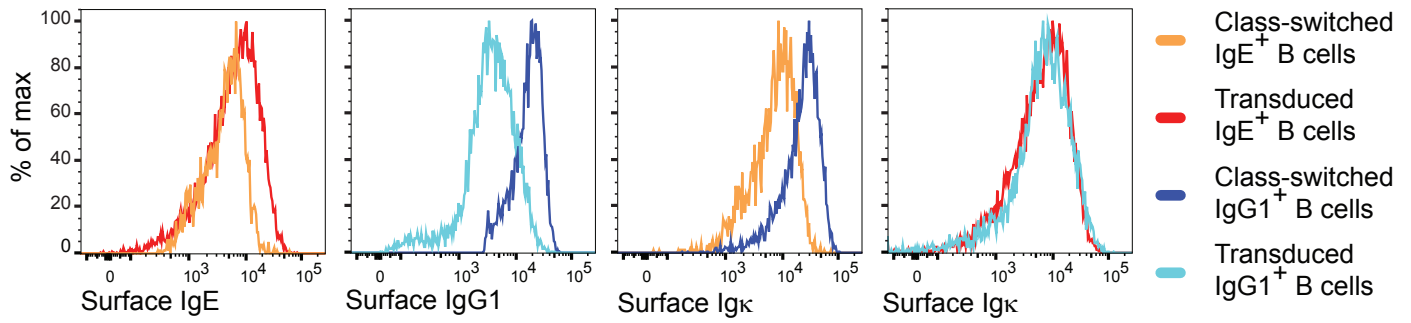

**B**

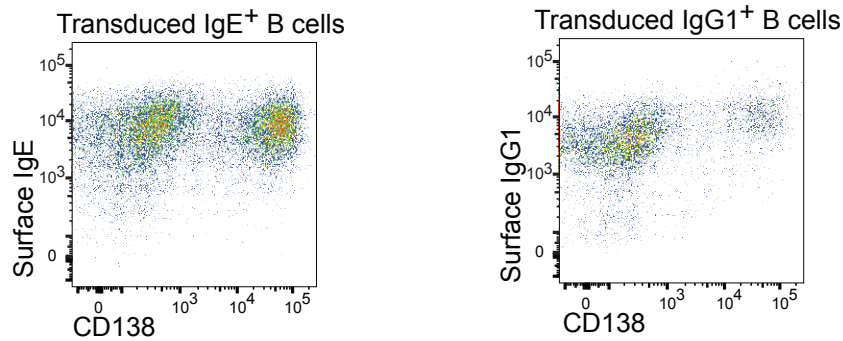

**C**

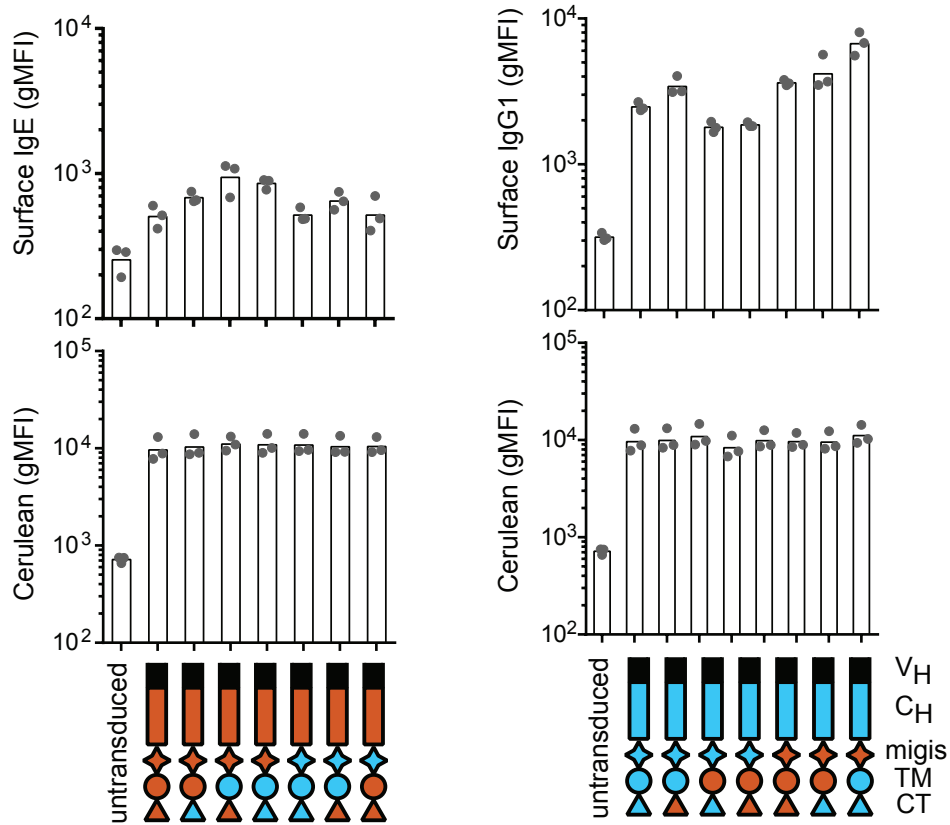

Supplement: supp [file elife-21238-supp-v1.zip]

# Figure 4–figure supplement 1

**A**

Ctrl *lrf4* het

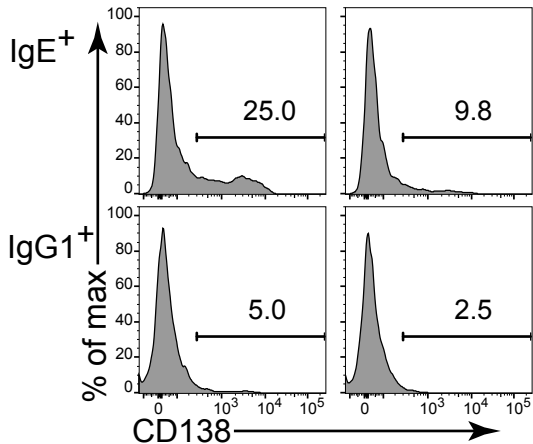**B**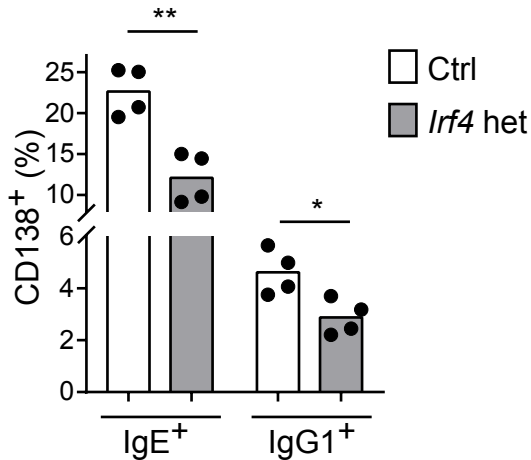

Supplement: supp [file elife-21238-supp-v1.zip]

# Figure 1 - figure supplement 2

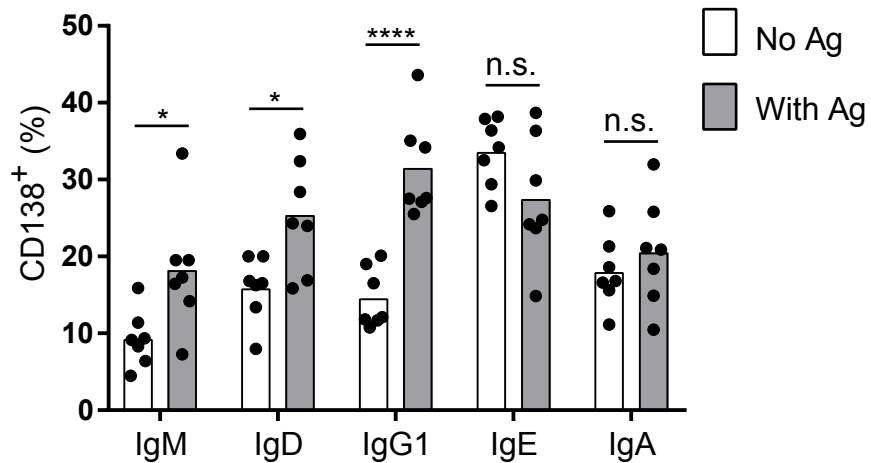

Supplement: supp [file elife-21238-supp-v1.zip]

**Figure 1 - figure supplement 1**

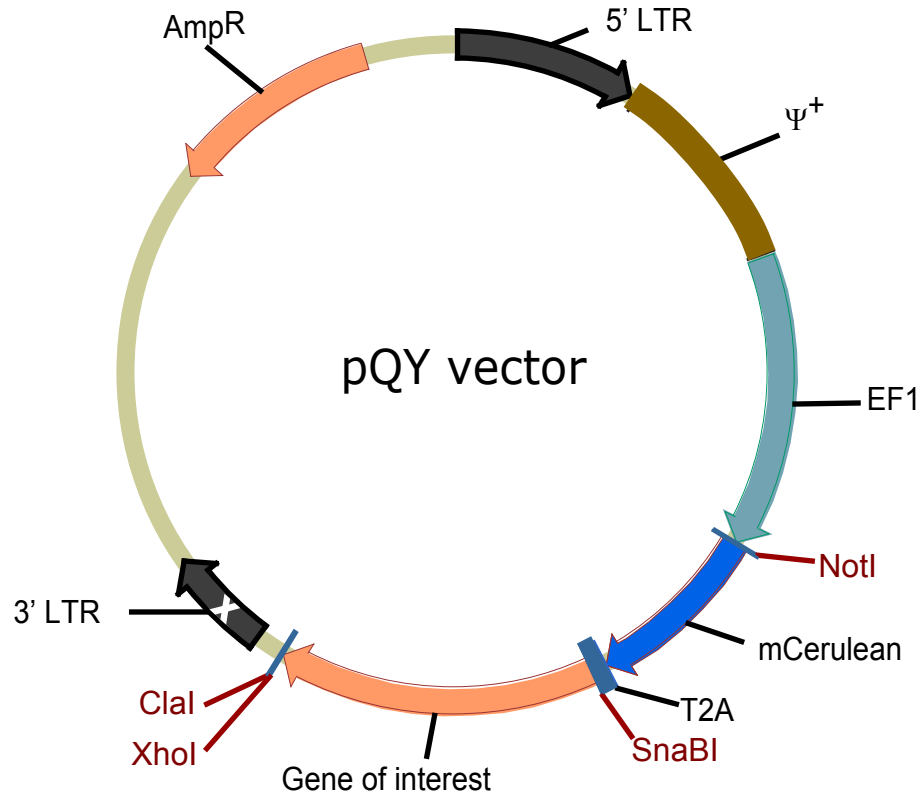

Supplement: supp [file elife-21238-supp-v1.zip]

**Figure 5–figure supplement 1**

**A**

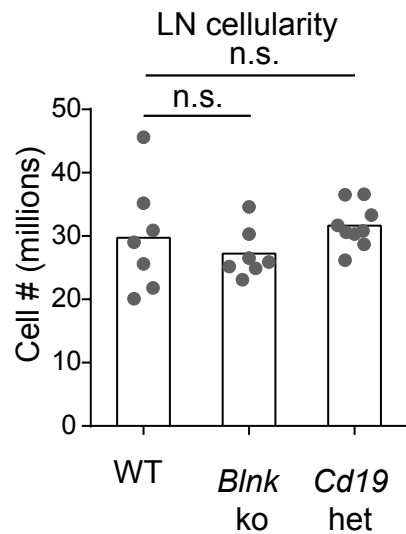

**B**

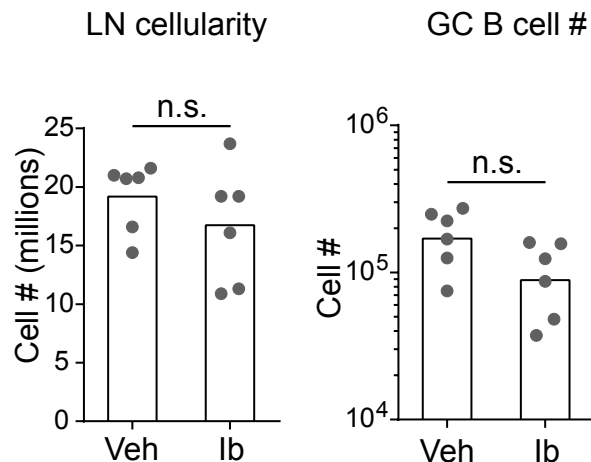

**C**

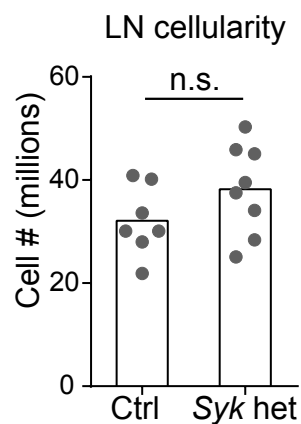

**D**

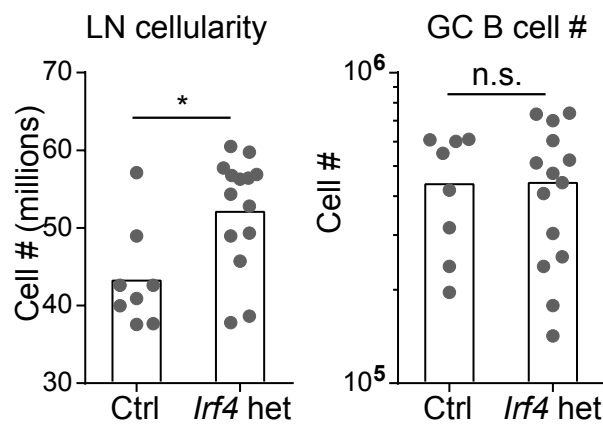

Supplement: supp [file elife-21238-supp-v1.zip]
